# Supplementary material for: Excitation-wavelength-dependent anti-thermal quenching of upconversion luminescence in hexagonal NaGdF4:Nd3+/Yb3+/Er3+ nanocrystals
Source: Royal Society of Chemistry journal article supplement (doi:10.1039/d2tc00263a), 2022-01-01
Supplement: d2tc00263a1.pdf [file d2tc00263a1.pdf]

## Excitation wavelength-dependent anti-thermal quenching of upconversion luminescence in hexagonal NaGdF<sub>4</sub>:Nd<sup>3+</sup>/Yb<sup>3+</sup>/Er<sup>3+</sup> nanocrystals

Tao Pang<sup>1, #, \*</sup>, Yanyan Wu<sup>1, #</sup>, Yujian Zhang<sup>2</sup>, Ronghua Jian<sup>1</sup>, Junwen Mao<sup>1</sup>, Hong Wang<sup>3, \*</sup>, Hai Guo<sup>4, \*</sup>

<sup>1</sup> College of Science, Huzhou University, Huzhou, 313000, China

<sup>2</sup> College of Engineering, Huzhou University, Huzhou, 313000, China

<sup>3</sup> Physics Department, Dalian Maritime University, Dalian, 116026, China

<sup>4</sup> Department of Physics, Zhejiang Normal University, Jinhua, 321004, China

# These authors contributed equally to this work

\*corresponding author E-mail address: [tpang@126.com](mailto:tpang@126.com), [hongwang@dlnu.edu.cn](mailto:hongwang@dlnu.edu.cn), [ghh@zjnu.cn](mailto:ghh@zjnu.cn)

### Supporting materials

#### I. Rate equations for UC luminescence dynamics

To simplify the problem, several unimportant processes are omitted, such as the radiative transition of <sup>4</sup>I<sub>13/2</sub> to <sup>4</sup>I<sub>15/2</sub>. Therefore, according to a simple six-level model (see Figure S2), the luminescence dynamics process is described as follows:

$$\frac{dN_0}{dt} = A_{50}N_5 + A_{40}N_4 - W_{ET2}N_{Yb1}N_0 \quad (1)$$

$$\frac{dN_1}{dt} = W_{21}N_2 - W_{ET4}N_{Yb1}N_1 \quad (2)$$

$$\frac{dN_2}{dt} = W_{ET2}N_{Yb1}N_0 - W_{ET3}N_{Yb1}N_2 - W_{21}N_2 \quad (3)$$

$$\frac{dN_4}{dt} = W_{54}N_5 + W_{ET4}N_{Yb1}N_1 - W_{43}N_4 - A_{40}N_4 \quad (4)$$

$$\frac{dN_5}{dt} = W_{ET3}N_{Yb1}N_2 - A_{50}N_5 - W_{54}N_5 \quad (5)$$

where  $N_0, N_1, N_2, N_3, N_4, N_5, N_{Yb1}$  are populations of levels <sup>4</sup>I<sub>15/2</sub> (Er<sup>3+</sup>), <sup>4</sup>I<sub>13/2</sub> (Er<sup>3+</sup>), <sup>4</sup>I<sub>11/2</sub> (Er<sup>3+</sup>), <sup>4</sup>I<sub>9/2</sub> (Er<sup>3+</sup>), <sup>4</sup>F<sub>9/2</sub> (Er<sup>3+</sup>), <sup>2</sup>H<sub>11/2</sub>/<sup>4</sup>S<sub>3/2</sub> (Er<sup>3+</sup>), and <sup>2</sup>F<sub>5/2</sub> (Yb<sup>3+</sup>), respectively,  $W_{ET2}, W_{ET3}, W_{ET4}$  are energy transfer rates from Yb<sup>3+</sup> to Er<sup>3+</sup>,  $W_{21}, W_{43}$ , and  $W_{54}$  are the multi-

phonon relaxation rates of levels  $^4I_{11/2}$  ( $\text{Er}^{3+}$ ),  $^4F_{9/2}$  ( $\text{Er}^{3+}$ ), and  $^4S_{3/2}$  ( $\text{Er}^{3+}$ ).

At steady state ( $dN_i/dt = 0$ ), from Eqs. (3) and (5) we obtain

$$N_5 = \frac{W_{ET2}W_{ET3}N_{Yb1}^2N_0}{(A_{50}+W_{54})(W_{ET3}N_{Yb1}+W_{21})} \quad (6)$$

Further, according to Eqs. (2), (3), (4) and (6) we obtain

$$N_4 = \frac{1}{W_{43}+A_{40}} \left[ \frac{W_{ET2}W_{ET3}W_{54}N_0N_{Yb1}^2}{(A_{50}+W_{54})(W_{ET3}N_{Yb1}+W_{21})} + \frac{W_{ET2}N_0W_{21}}{W_{ET3}+W_{21}/N_{Yb1}} \right] \quad (7)$$

Taken together,  $N_4$  and  $N_5$  are both increasing function of  $N_{Yb1}$ . Upon 808 nm excitation with low pump power,  $N_{Yb1}$  takes the form

$$N_{Yb1} = \frac{W_{ET1}N_{Yb0}N_{Nd1}}{W_{ET2}N_0+W_{ET3}N_2+W_{ET3}N_1} \approx \frac{W_{ET1}N_{Yb}\rho_{808}\sigma_{Nd}N_{Nd}}{W_{ET2}N_{Er}} \quad (8)$$

In contrast, under 980 nm excitation with low pump power,  $N_{Yb1}$  is re-written as follows:

$$N_{Yb1} = \frac{\rho\sigma N_{Yb0}}{W_{ET2}N_0+W_{ET3}N_2+W_{ET3}N_1} \approx \frac{\rho_{980}\sigma_{Yb}N_{Yb}}{W_{ET2}N_{Er}} \quad (9)$$

where  $W_{ET1}$  are energy transfer rates from  $\text{Nd}^{3+}$  to  $\text{Yb}^{3+}$ ,  $\rho_{808}$  and  $\rho_{980}$  are the output power of lasers,  $\sigma_{Nd}$  is the absorption cross-section of  $\text{Nd}^{3+}$  ions at 808 nm,  $\sigma_{Yb}$  is the absorption cross-section of  $\text{Yb}^{3+}$  ions at 980 nm,  $N_{Yb0}$  and  $N_{Nd1}$  are populations of  $^2F_{7/2}$  ( $\text{Yb}^{3+}$ ) and  $^4F_{5/2}$  ( $\text{Nd}^{3+}$ ), respectively,  $N_{Er}$ ,  $N_{Yb}$  and  $N_{Nd}$  are the concentration of  $\text{Er}^{3+}$ ,  $\text{Yb}^{3+}$  and  $\text{Nd}^{3+}$  ions, respectively.

## II. Figures

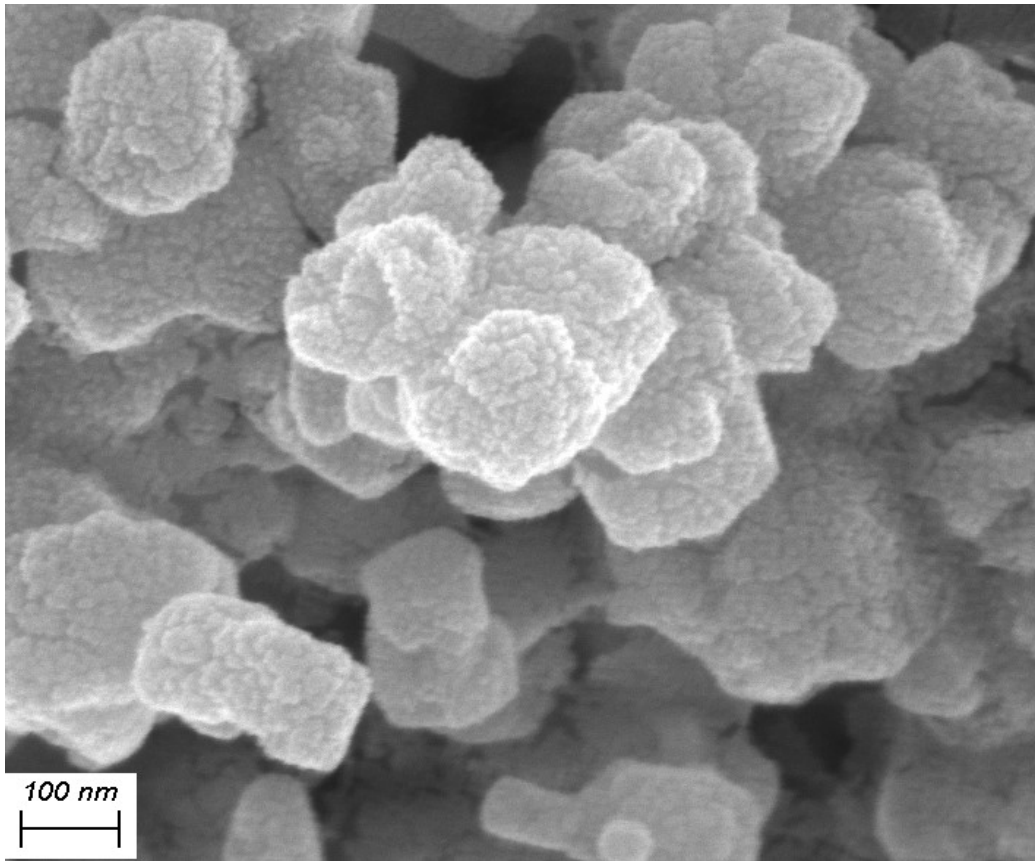

Figure S1 High resolution SEM image of the sample with 1%Nd<sup>3+</sup>

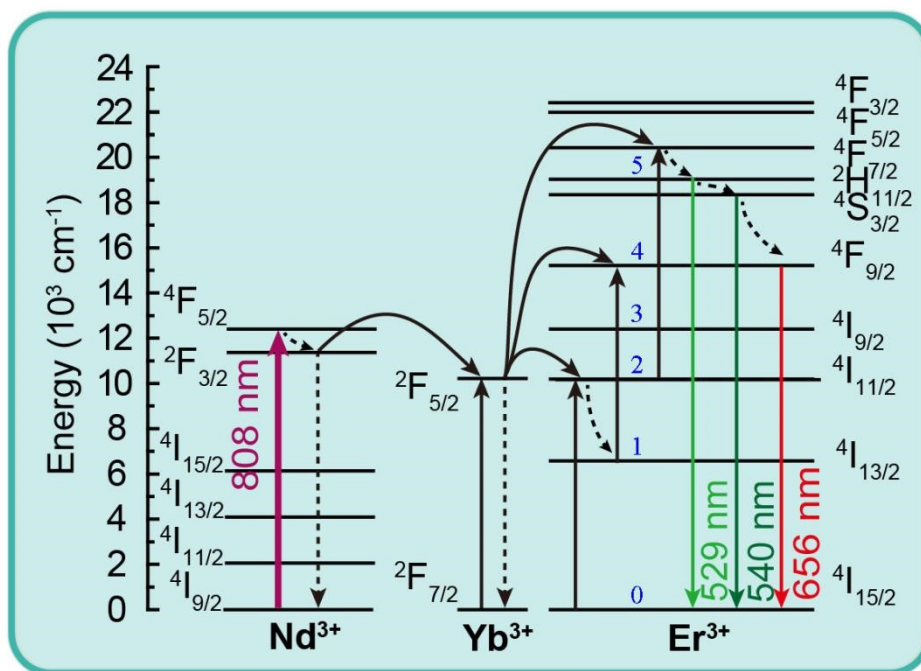

Figure S2 Proposed population pathways for upconversion luminescence of Nd<sup>3+</sup>, Yb<sup>3+</sup> and Er<sup>3+</sup> tri-doping

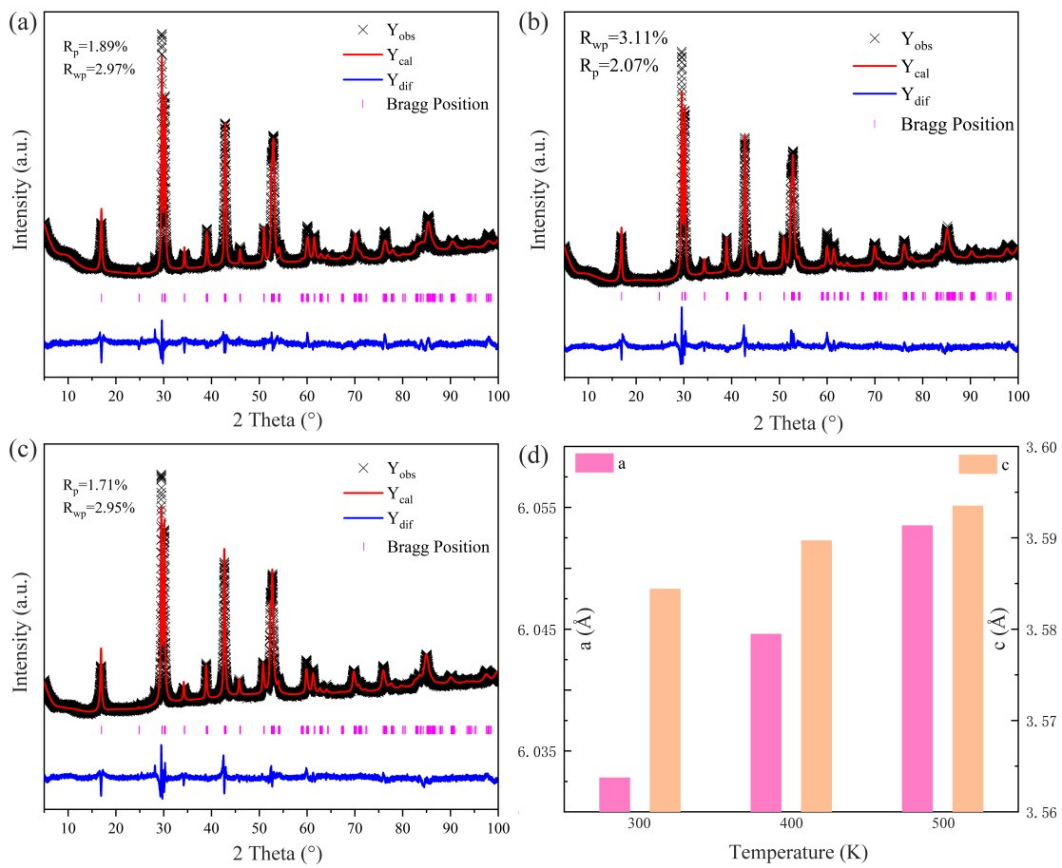

Figure S3 Rietveld refinement of XRD pattern at three representative temperatures. (a) 300 K; (b) 400 K; (c) 500 K; (d) cell parameters at various temperatures.

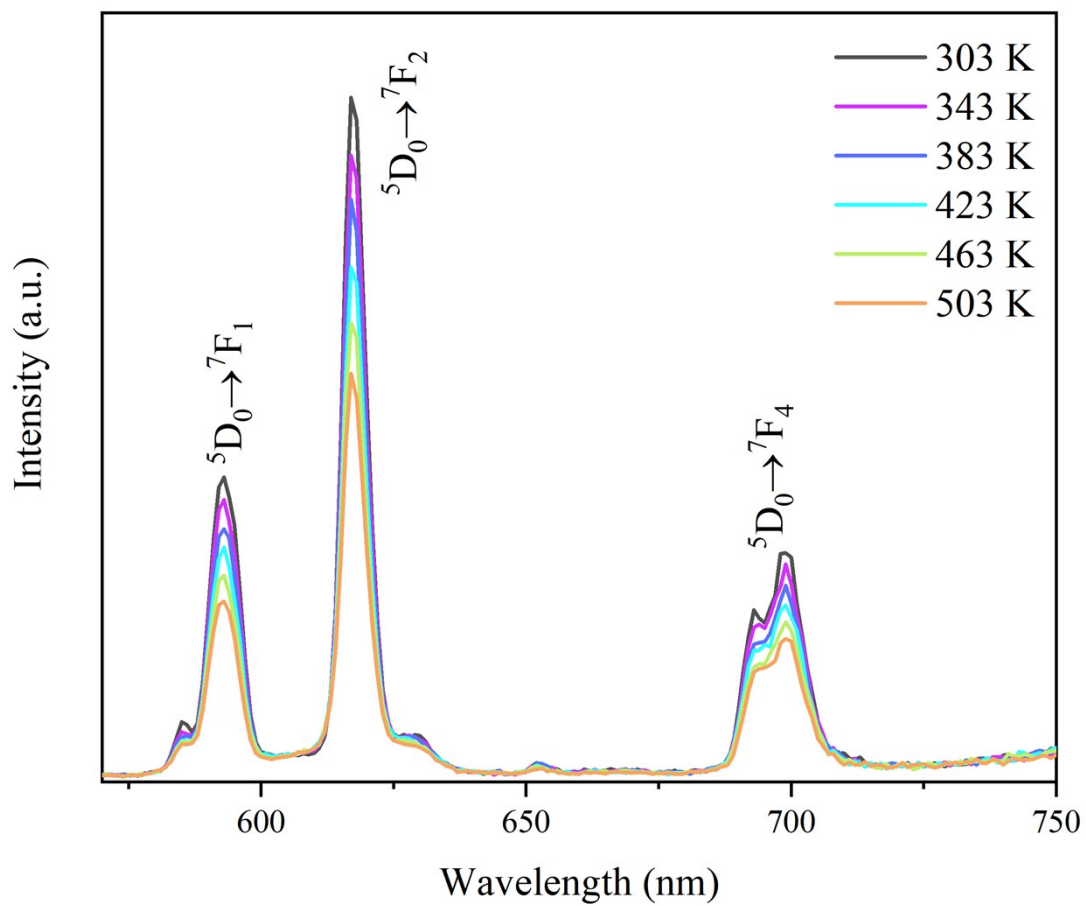

Figure S4 394 nm-responsive PL spectra of NaGdF<sub>4</sub>:5%Eu<sup>3+</sup> at various temperatures

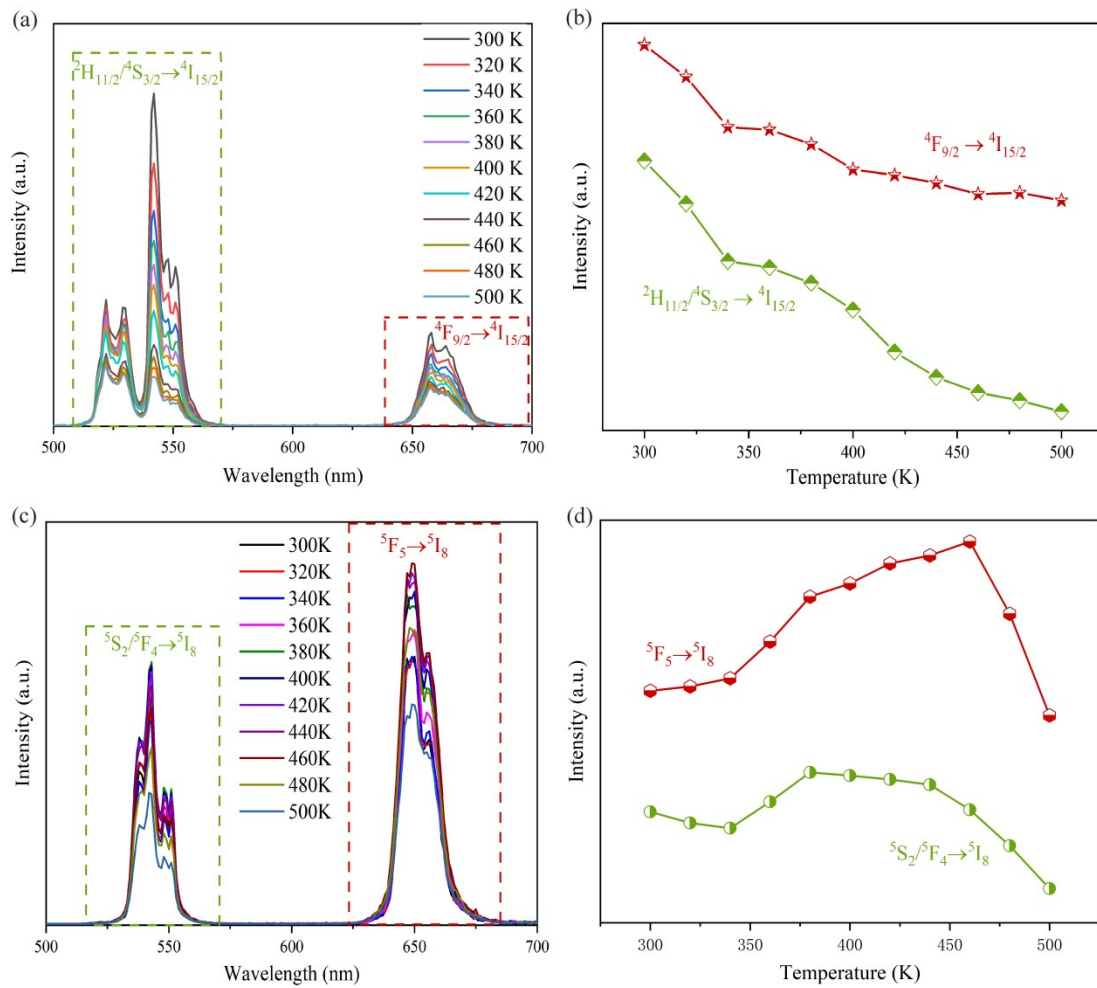

Figure S5 Upconversion luminescence properties at various temperature. (a) Upconversion spectra of NaGdF<sub>4</sub>:Yb<sup>3+</sup>/Er<sup>3+</sup> under 980 nm excitation; (b) Dependence of emission intensity originated from Er<sup>3+</sup> on temperature; (c) Upconversion spectra of NaGdF<sub>4</sub>:Yb<sup>3+</sup>/Ho<sup>3+</sup> under 980 nm excitation; (d) Dependence of emission intensity originated from Ho<sup>3+</sup> on temperature

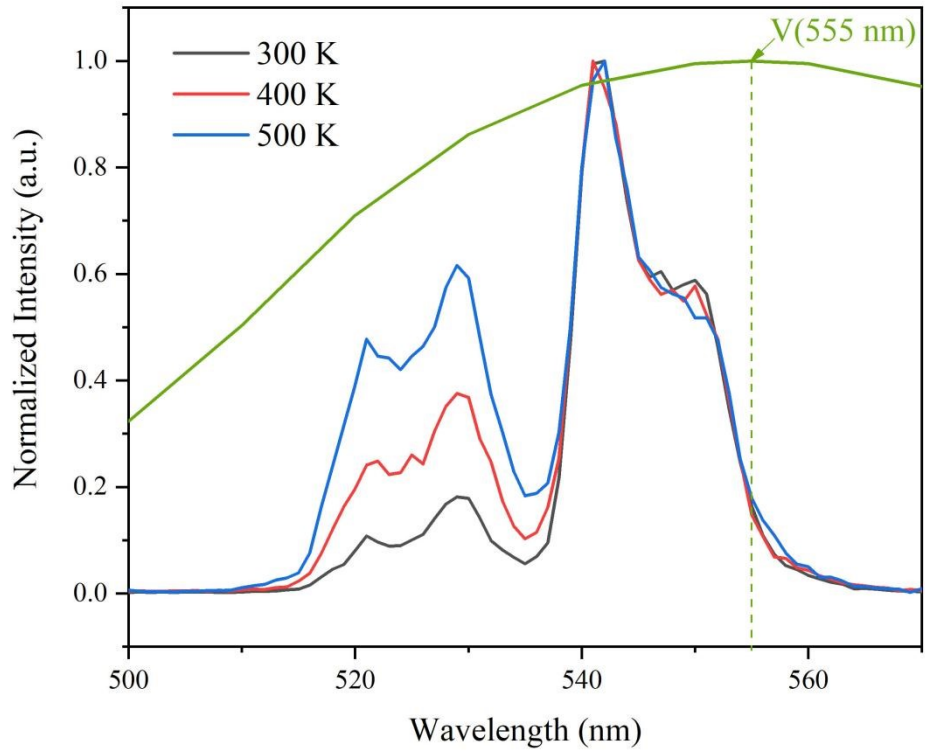

Figure S6 Normalized upconversion spectra of NaGdF<sub>4</sub>:Nd<sup>3+</sup>/Yb<sup>3+</sup>/Er<sup>3+</sup> under 808 nm excitation and various temperatures as well as part of the visibility function V(λ) in the 500-570 nm range.
